# Supplementary material for: Enteric Viral Infections among Domesticated South American Camelids: First Detection of Mammalian Orthoreovirus in Camelids
Source: MDPI journal article supplement (doi:10.3390/ani11051455), 2021-05-19
Supplement: s1 [file s1]

**Table S1.** Primers used for genotyping (serotype) of MRV1, MRV2, MRV3 and MRV4 of the controls isolated in the MA104 cell line.

| Virus  | Gene                  | Assay  | Primer*  | Primer sequence 5'→3'        | Position  | Product size (pb) | Reference  |
|--------|-----------------------|--------|----------|------------------------------|-----------|-------------------|------------|
| MRV1   | S1 ( $\sigma$ 1)<br>+ | RT-PCR | MRV1-F1  | GCTATTCGCGCCTATGGATGC        | 1-21      | 1421              | This study |
|        |                       |        | MRV1-R1  | CTCACATTRCAAGGATACAT-KATCGTC | 1395-1421 |                   |            |
| MRV2   | S1 ( $\sigma$ 1)<br>+ | RT-PCR | MRV2-F2  | GCTATTCGYACTSATGTC           | 2-19      | 1389              | This study |
|        |                       |        | MRV2-R2  | TACATMATNGTCATCGGC           | 1373-1390 |                   |            |
| MRV3-4 | S1 ( $\sigma$ 1)<br>+ | RT-PCR | MRV3-4.F | GCTATTKGTCGKATGGAT           | 3-20      | 1394              | This study |
|        |                       |        | MRV3-4.R | GRTCCTCACGTGAARCT            | 1379-1396 |                   |            |

MRV1 = mammalian orthoreovirus serotype 1; MRV2 = mammalian orthoreovirus serotype 2; MRV3-4 = mammalian orthoreovirus serotype 3 and 4.

<sup>+</sup>S1 = Sigma-1. \* Primers position were determined based on reference MRV1 – T1 Lang strain M14779, the MRV2-T2 strain M35964 and MRV3-4 – T3 strains EF494441.
